# Supplementary material for: Diversity in Aβ deposit morphology and secondary proteome insolubility across models of Alzheimer-type amyloidosis
Source: PubMed Central journal article supplement (PMC7137436; doi:10.1186/s40478-020-00911-y), 2020-04-06

Figure S1

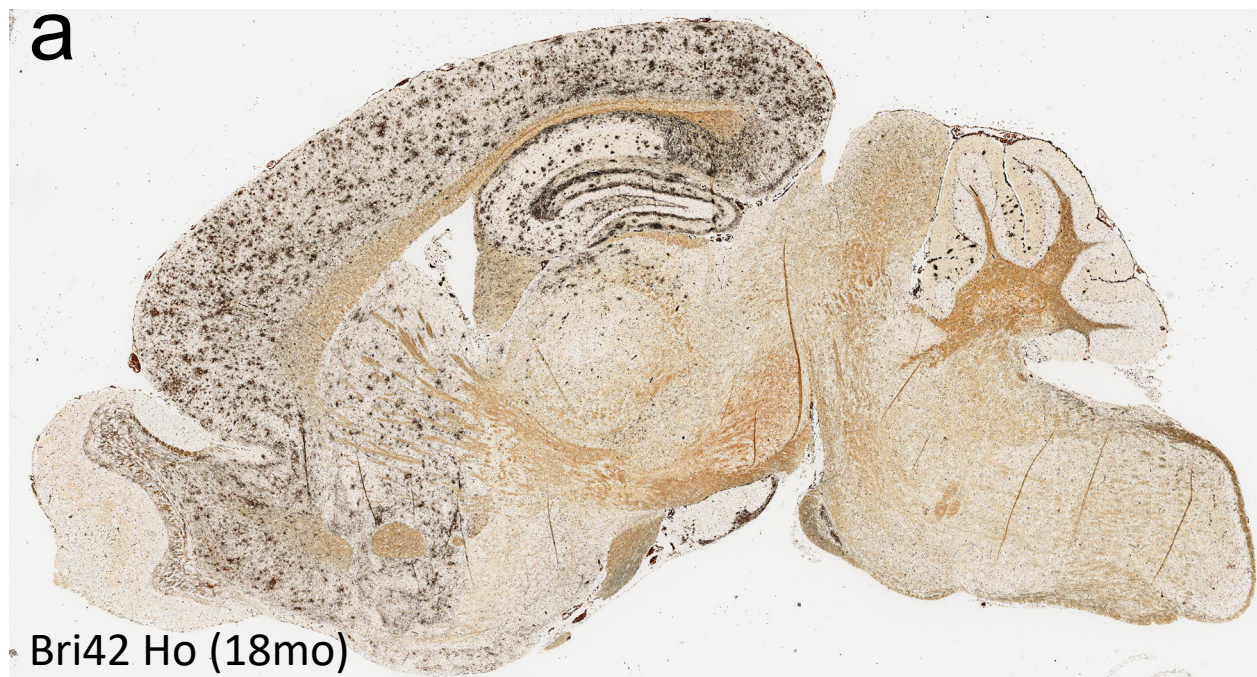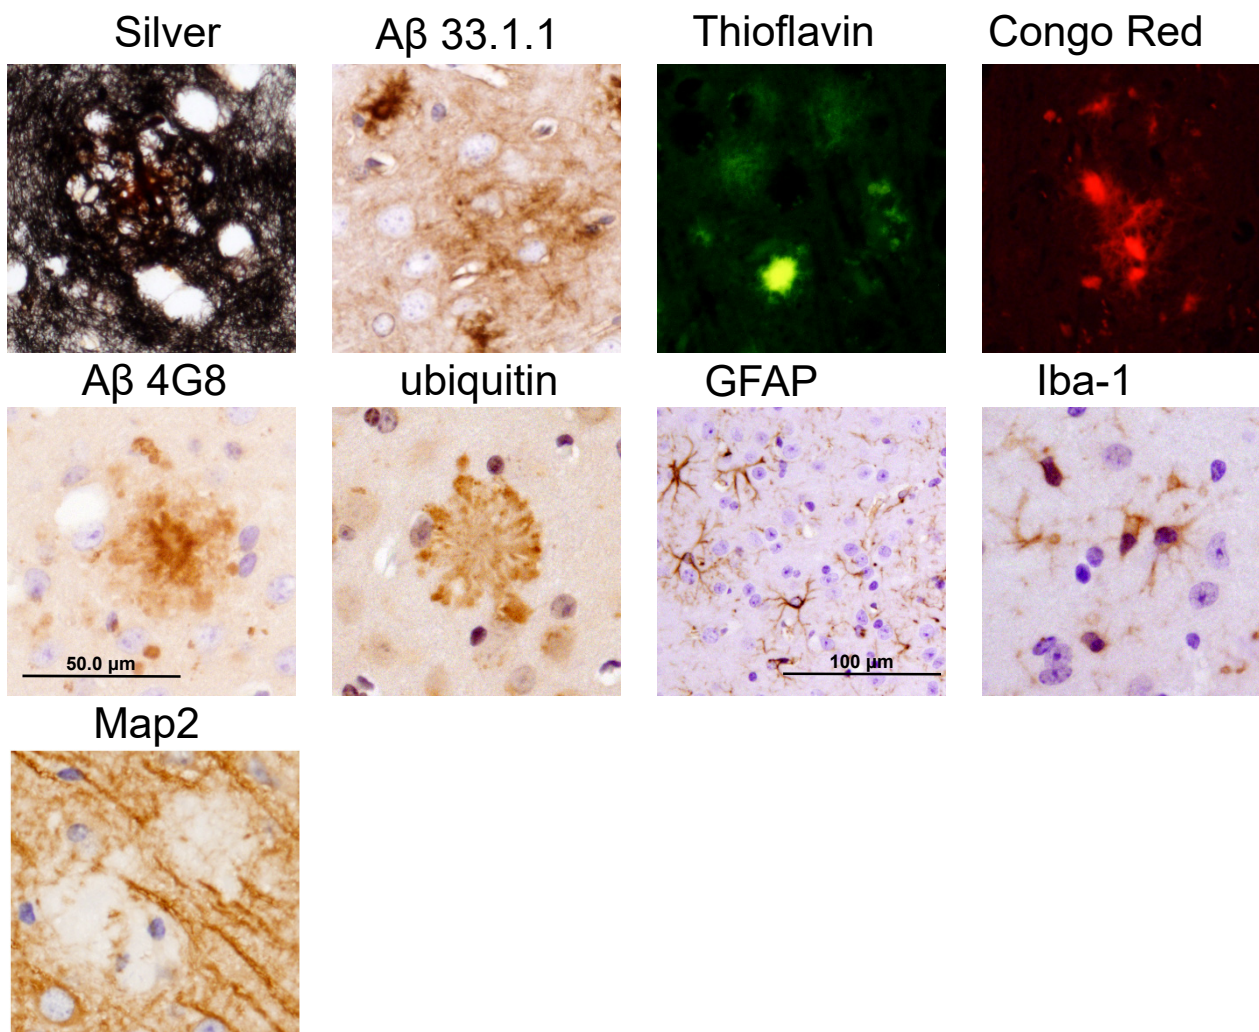

Figure S1

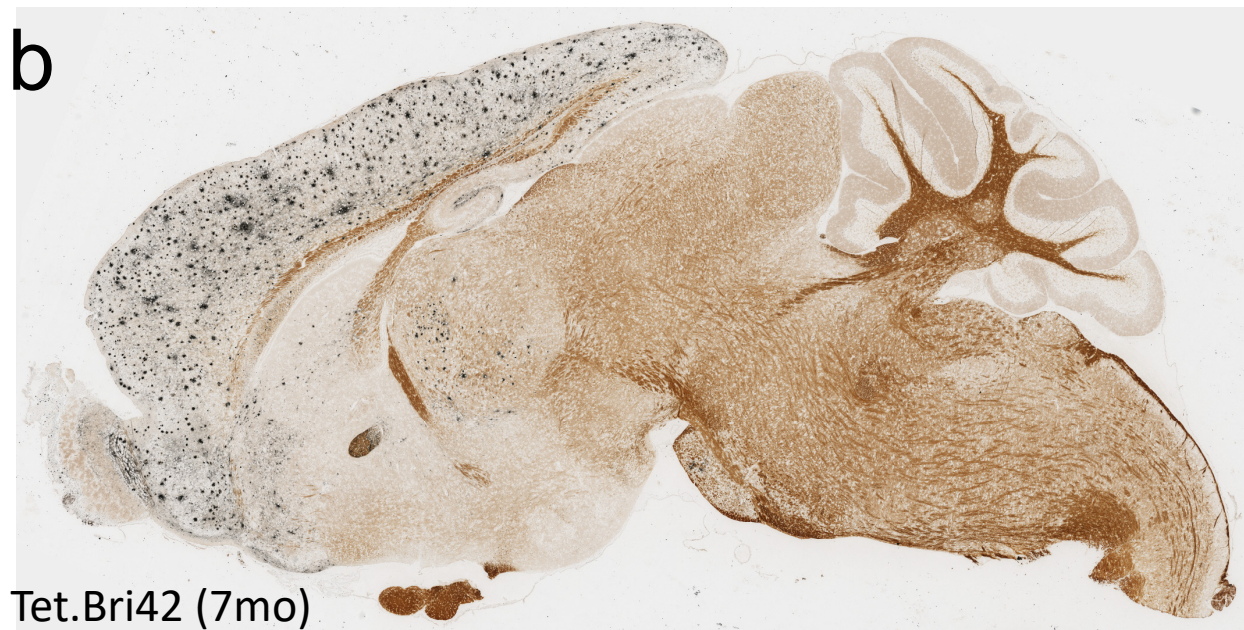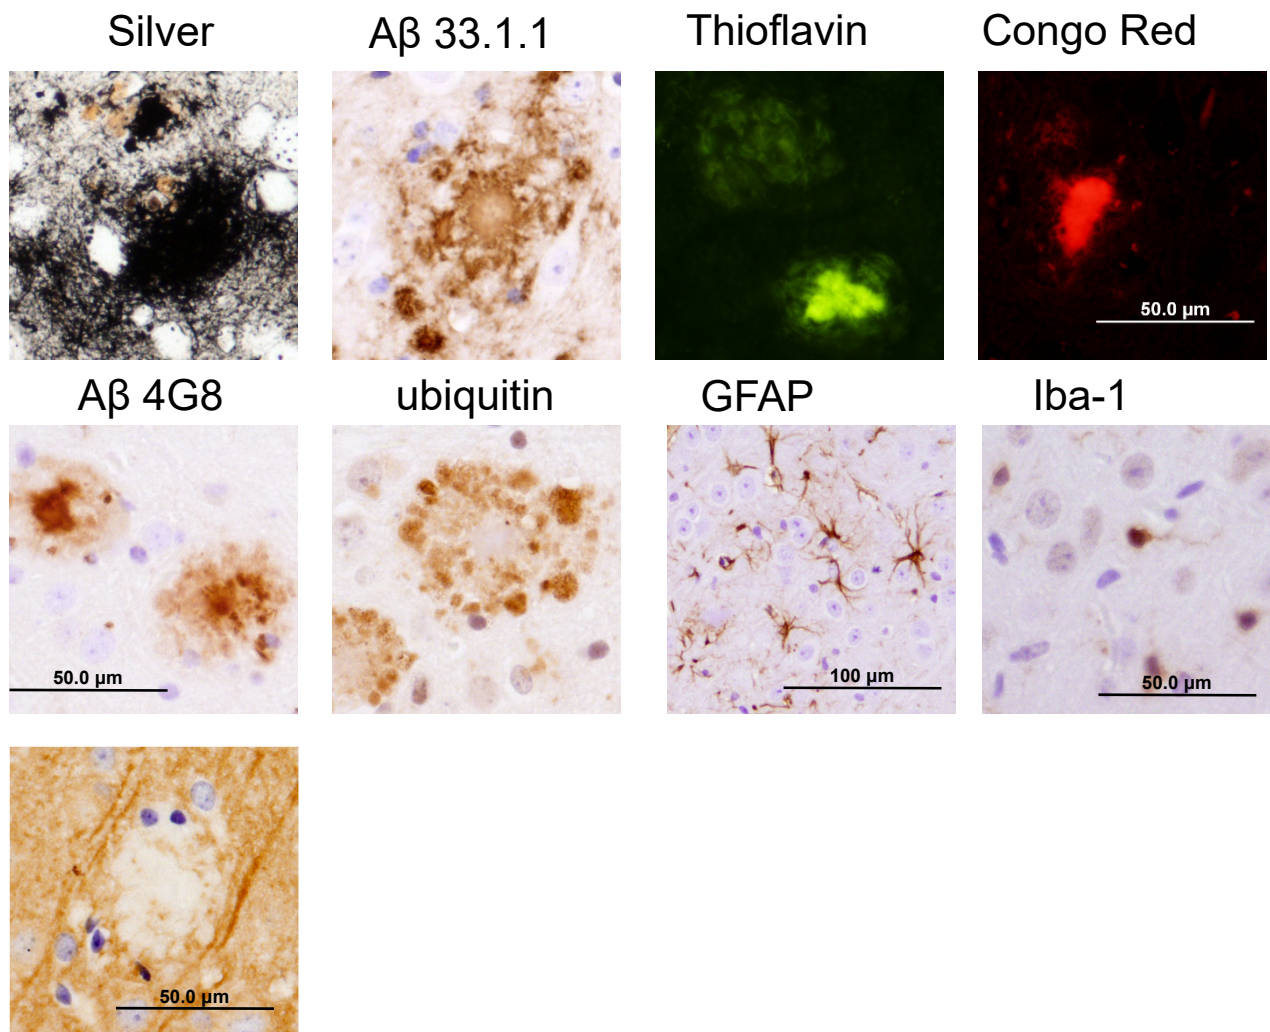

Figure S1

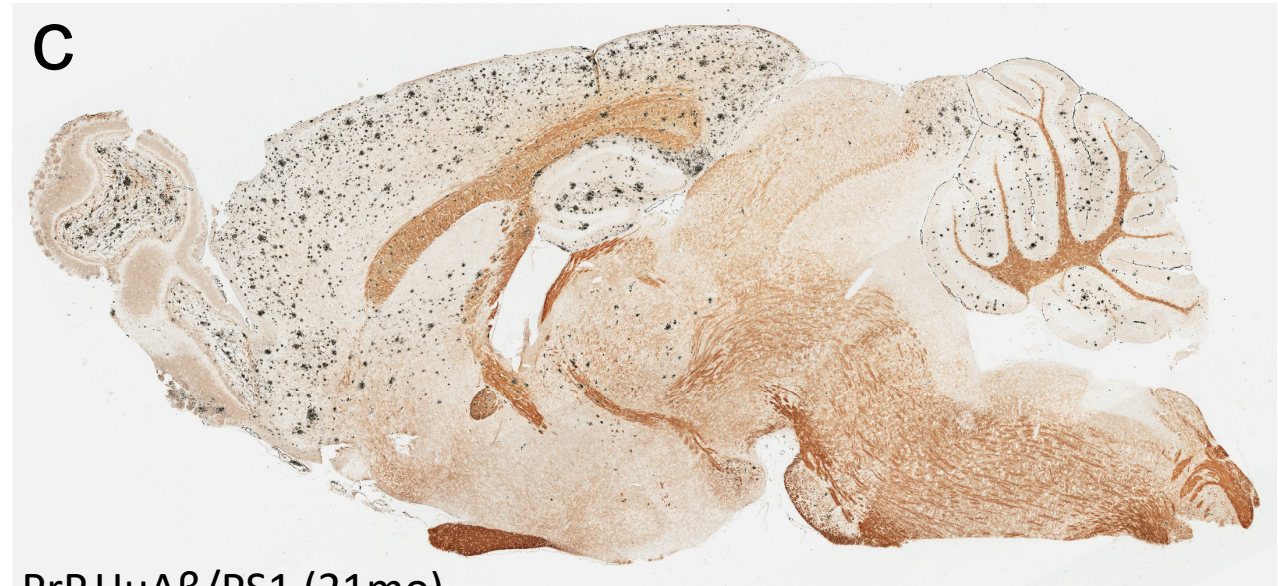

PrP.HuAβ/PS1 (21mo)

Silver

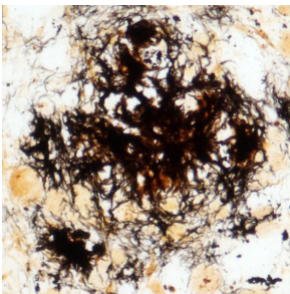

Aβ 33.1.1

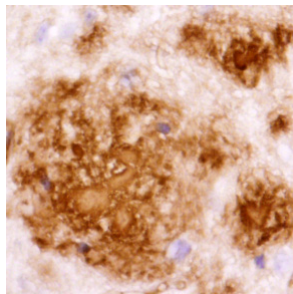

Thioflavin

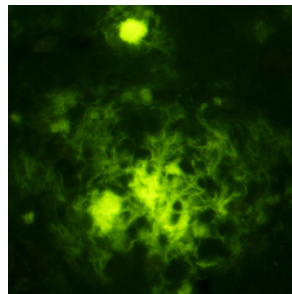

Congo Red

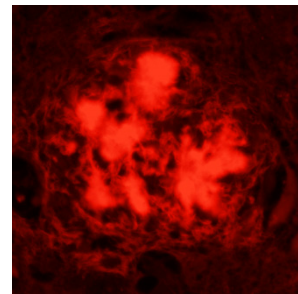

Aβ 4G8

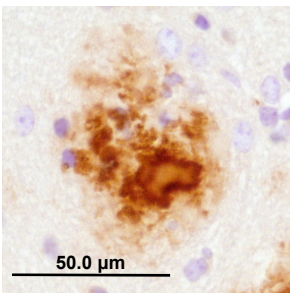

ubiquitin

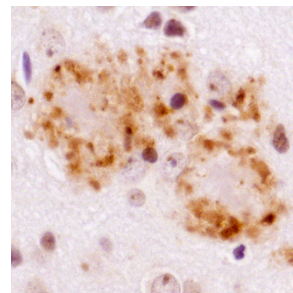

GFAP

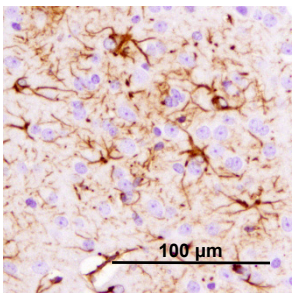

Iba-1

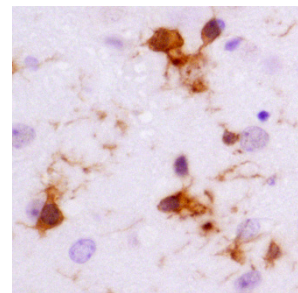

Map2

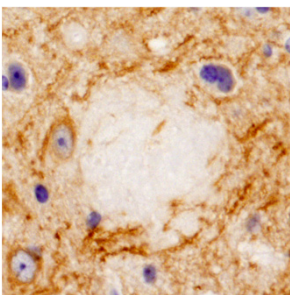

Figure S1

d

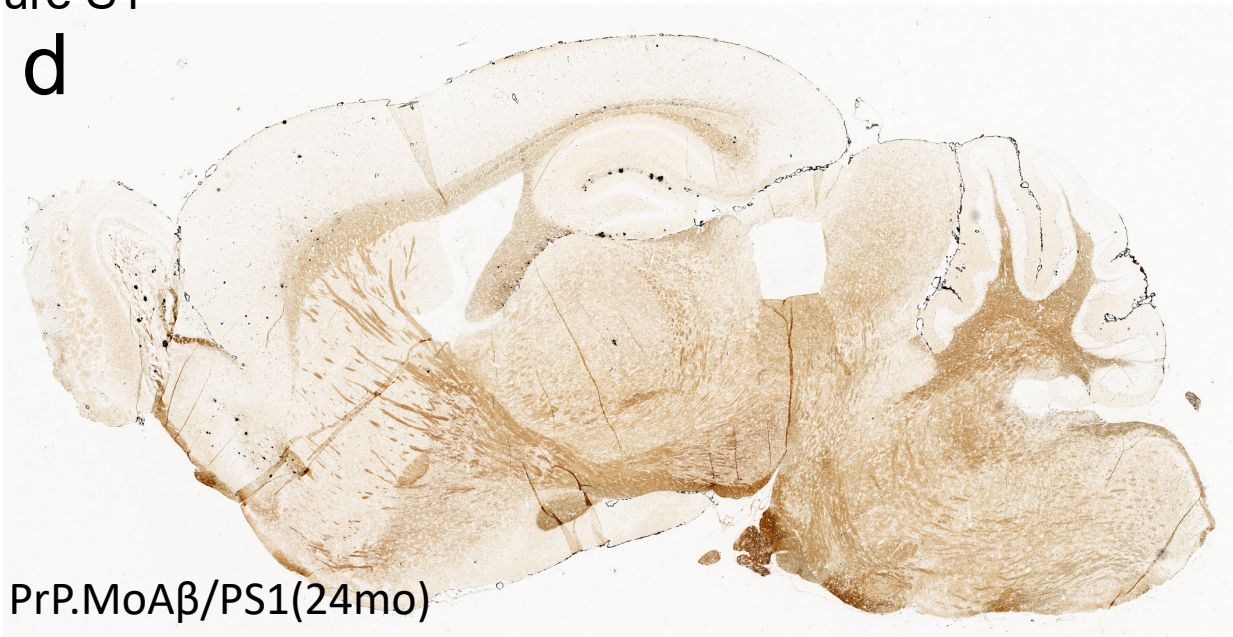

Silver

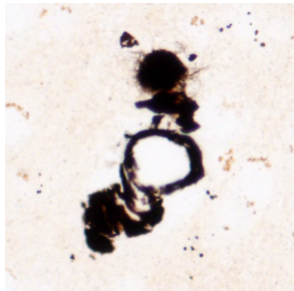

Aβ 33.1.1

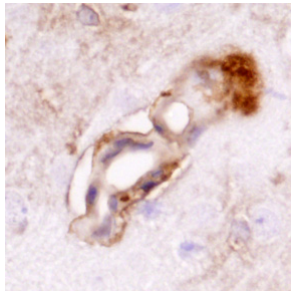

Thioflavin

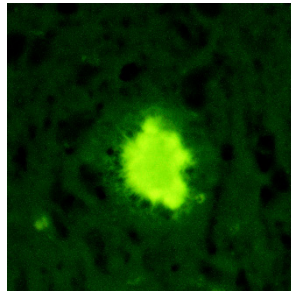

Congo Red

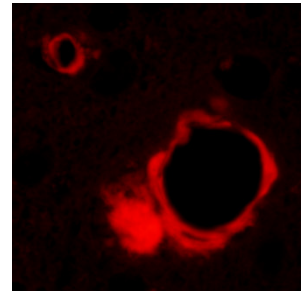

Aβ 4G8

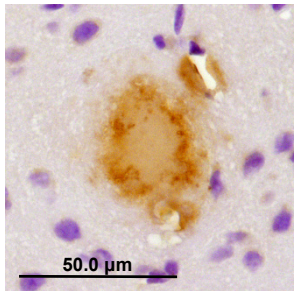

ubiquitin

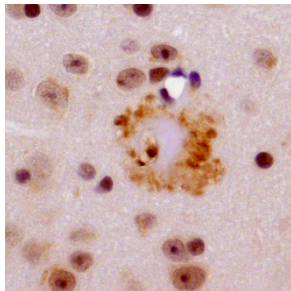

GFAP

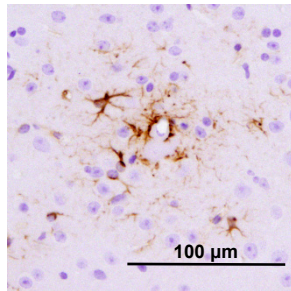

Iba-1

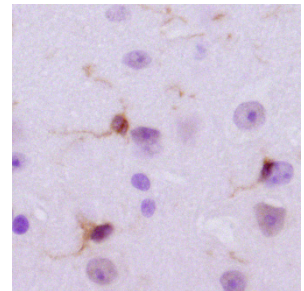

Map2

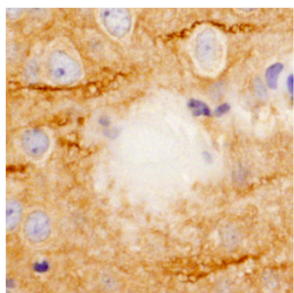

Figure S1

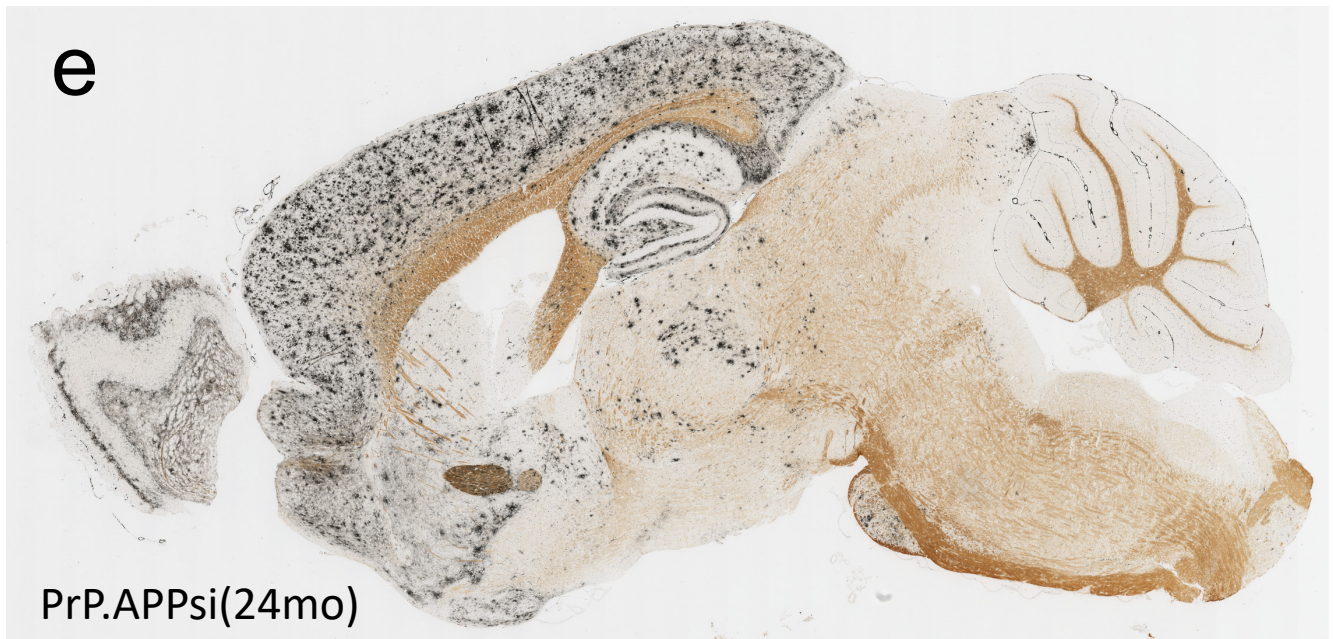

Silver

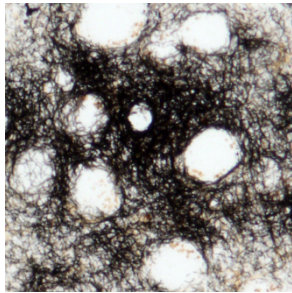

A $\beta$  4G8

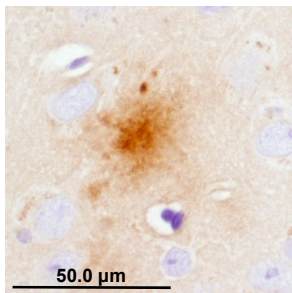

A $\beta$  33.1.1

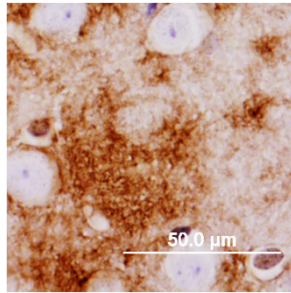

ubiquitin

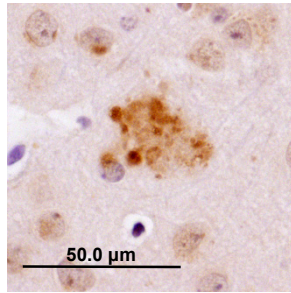

Thioflavin

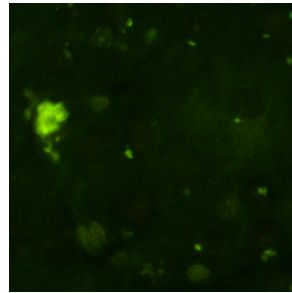

GFAP

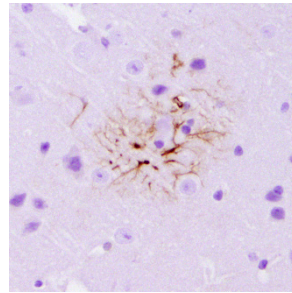

Congo Red

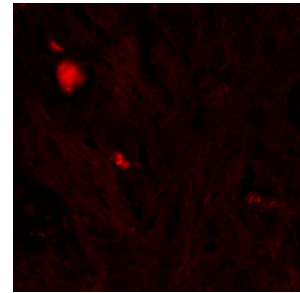

Iba-1

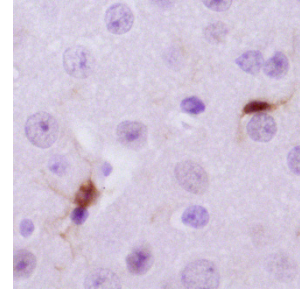

Map2

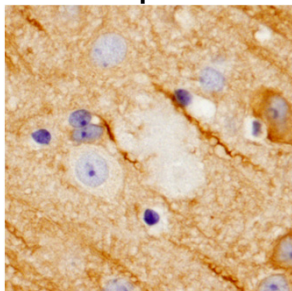

Figure S1

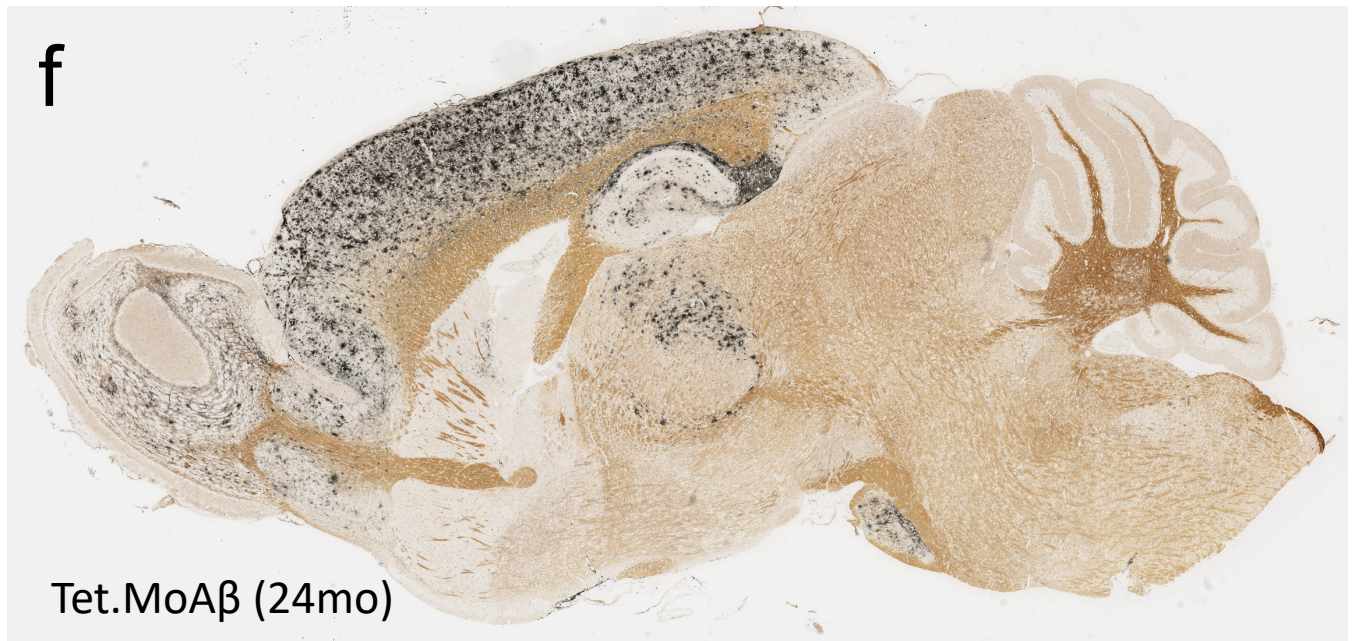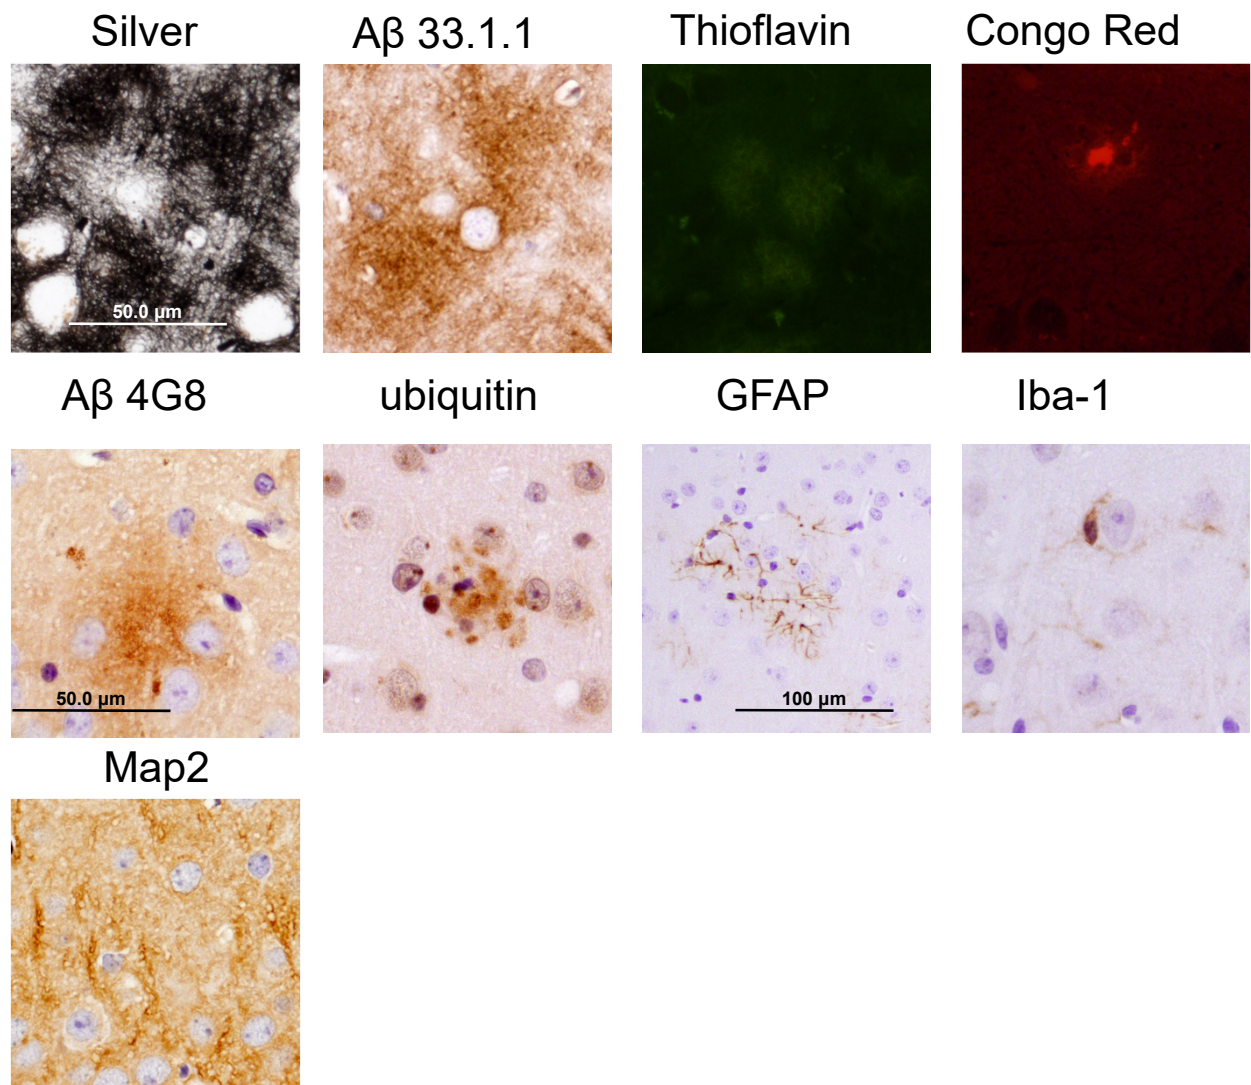

Figure S1

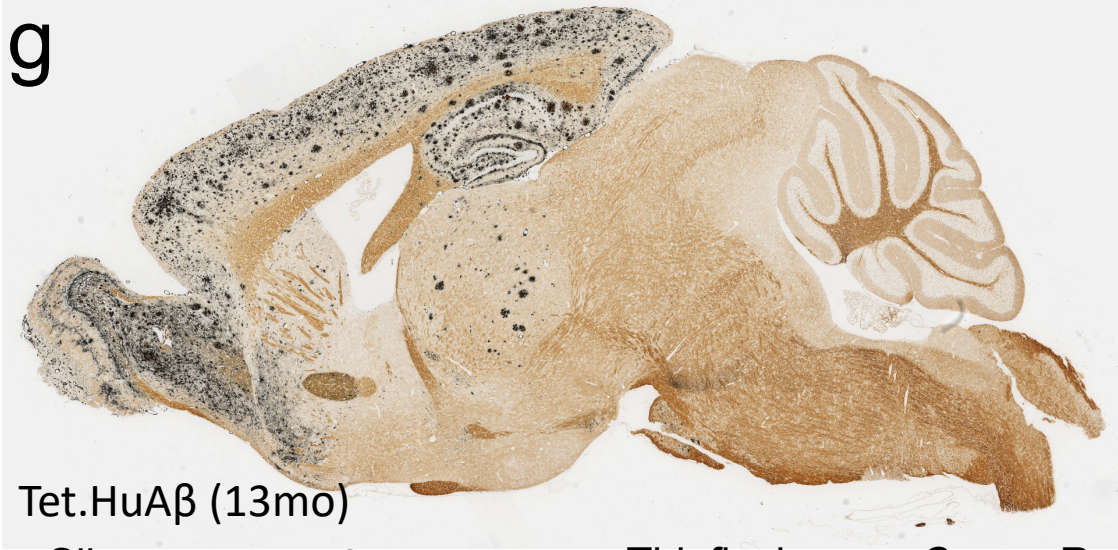

Silver

Aβ 33.1.1

Thioflavin

Congo Red

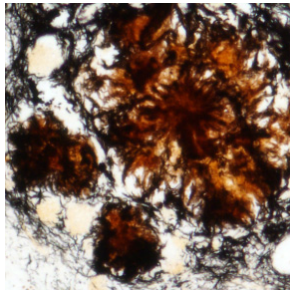

Aβ 4G8

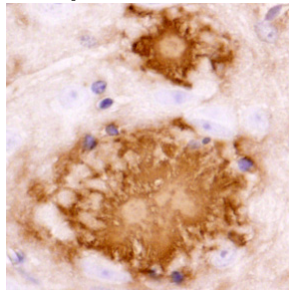

ubiquitin

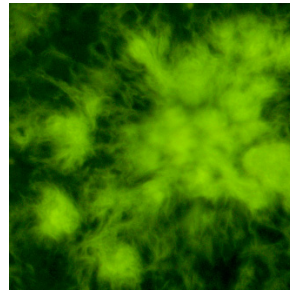

GFAP

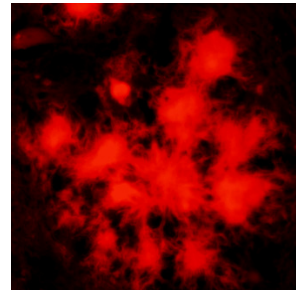

Iba-1

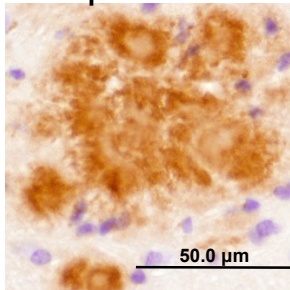

Map2

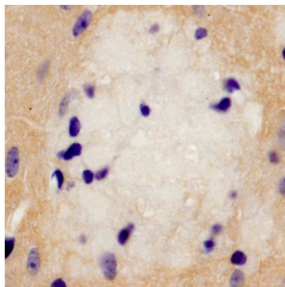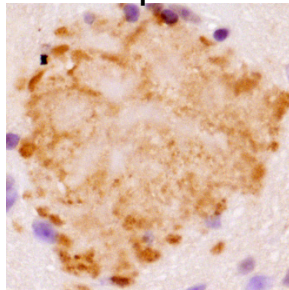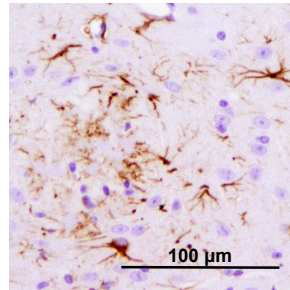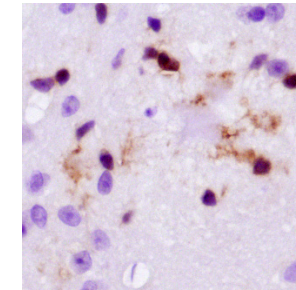

Figure S1

# g - continued

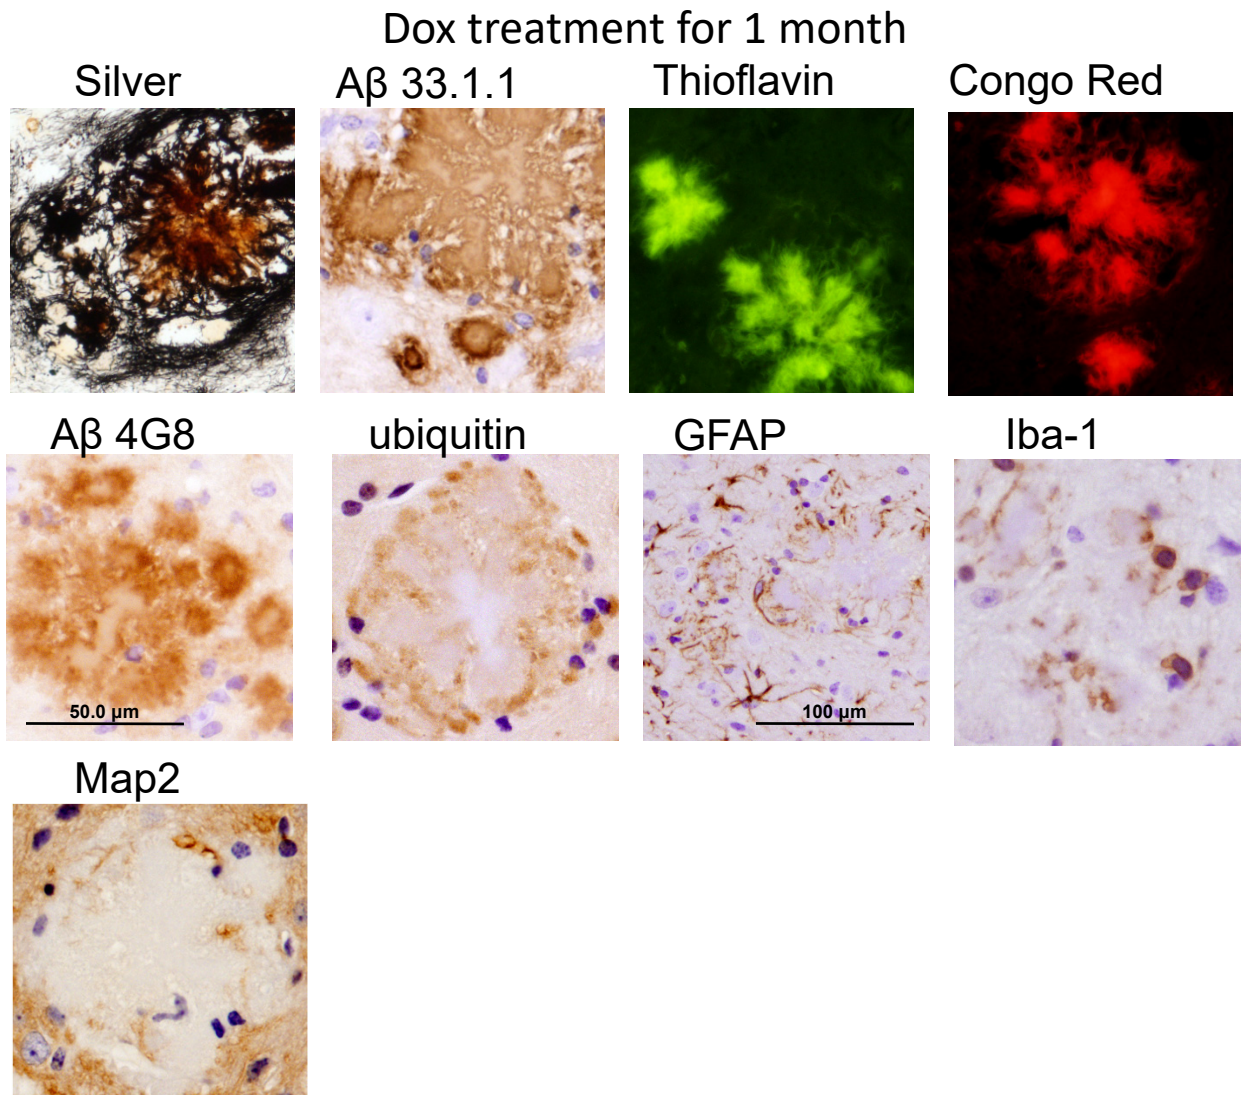



Figure S2

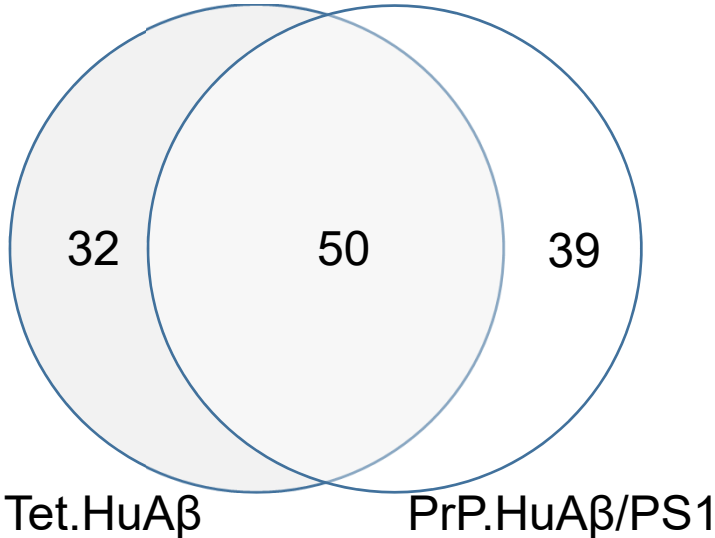

Figure S3

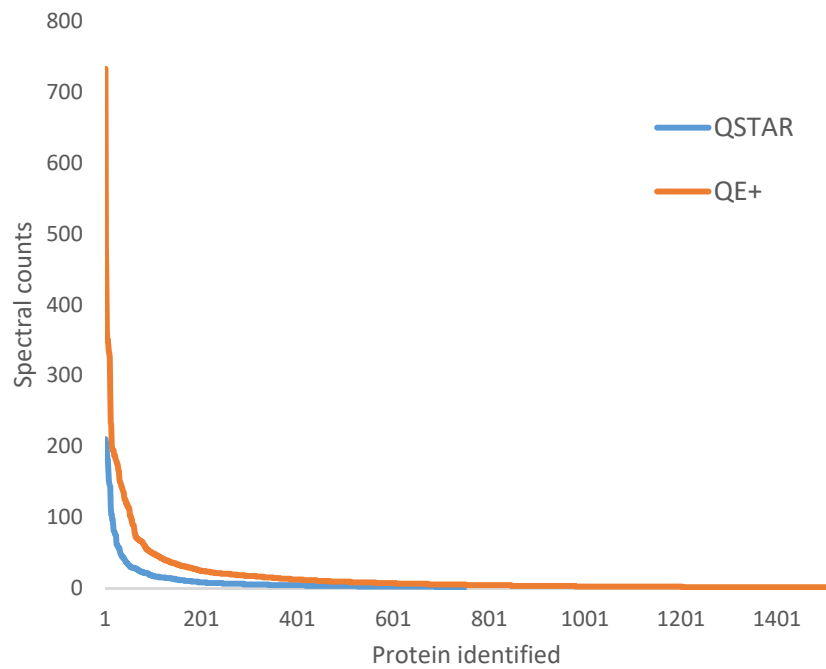

Supplement: 40478_2020_911_MOESM1_ESM.pdf [file 40478_2020_911_MOESM1_ESM.pdf]
